# Supplementary material
Source: PubMed Central journal article supplement (PMC9891994)

**HIV-uninfected**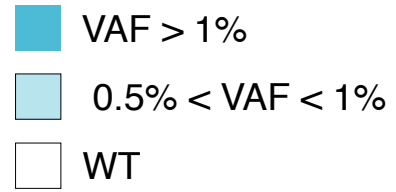**PLWH**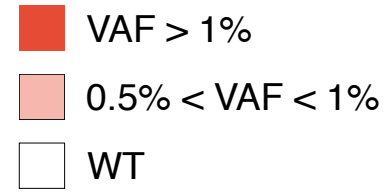**Coronary Artery Stenosis**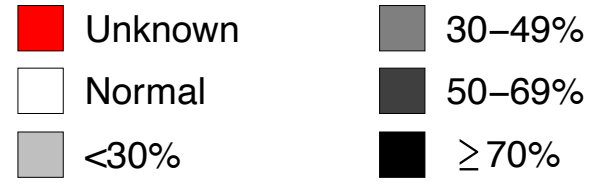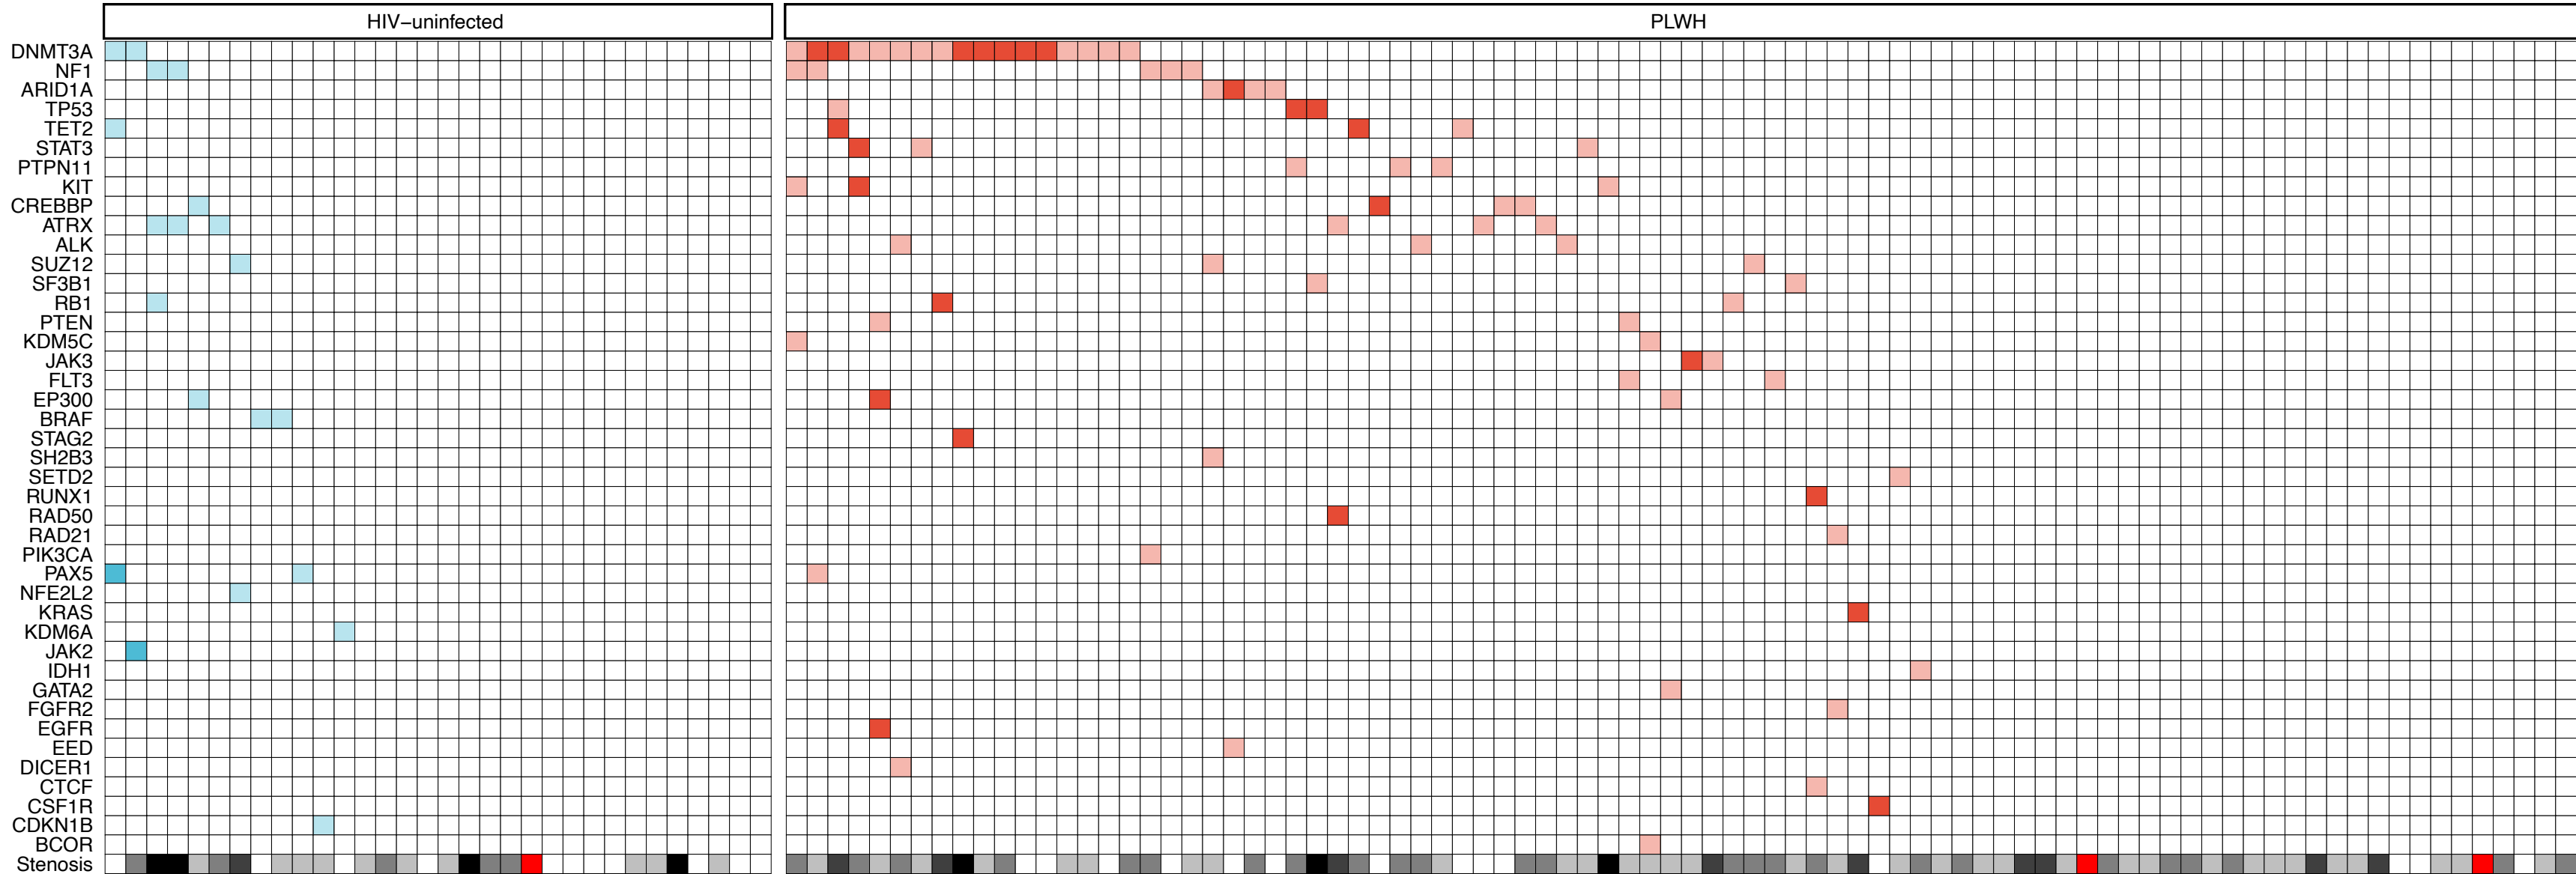

Supplement: NIHMS1866426-supplement-Supplemental_Figure_1.pdf [file NIHMS1866426-supplement-Supplemental_Figure_1.pdf]
